# Supplementary material for: Whole Genome Re-Sequencing and Characterization of Powdery Mildew Disease-Associated Allelic Variation in Melon
Source: PLoS One. 2016 Jun 16;11(6):e0157524. doi: 10.1371/journal.pone.0157524 (PMC4911151; doi:10.1371/journal.pone.0157524)
Supplement: S1 Table — (XLSX) [file pone.0157524.s007.xlsx]

## Sheet: Sheet1
S1 Table. Frequency of transitions and transversions in each accession.
Substitutions	SCNU1154	Edisto47	MR-1	PMR5
Transitions	2491678	2000032	2651378	2519806
Transversions	1118148	992046	1314449	1271485
Ts/Tv ratio	2.2284	2.0161	2.0171	1.9818
